# Supplementary material for: Prevalence of breast muscle myopathies (spaghetti meat, woody breast, white striping) and associated risk factors in broiler chickens from Ontario Canada
Source: PubMed Central journal article supplement (PMC9012353; doi:10.1371/journal.pone.0267019), 2022-04-15
Supplement: pone.0267019.s001.pdf [file pone.0267019.s001.pdf]

**S1 Table.** Macroscopic scoring scheme of breast myopathies

---

|                     |                                                                                                                                                                                                                                                                                                                                 |
|---------------------|---------------------------------------------------------------------------------------------------------------------------------------------------------------------------------------------------------------------------------------------------------------------------------------------------------------------------------|
| Spaghetti meat (SM) | <b>SM0 (absent):</b> without any myofiber separation<br><b>SM1 (present):</b> distinct myofiber separation                                                                                                                                                                                                                      |
| Woody breast (WB)   | <b>WB0 (absent):</b> without abnormal firmness<br><b>WB1 (moderate):</b> moderate increase in firmness either in the cranial or caudal aspects of the fillets, or both<br><b>WB2 (severe):</b> distinct increase in firmness diffusely throughout the fillets                                                                   |
| White striping (WS) | <b>WS0 (absent):</b> no distinct white lines<br><b>WS1 (mild):</b> 1 to 40 white lines with thickness < 1 mm<br><b>WS2 (moderate):</b> > 40 white lines, or 1 to 5 line(s) of 1.0 mm to 1.9 mm in width<br><b>WS3 (severe):</b> > 5 lines with the thickness of 1.0 mm to 1.9 mm or $\geq$ 1 lines with the thickness of 2.0 mm |

---
