# Supplementary material for: Prevalence of breast muscle myopathies (spaghetti meat, woody breast, white striping) and associated risk factors in broiler chickens from Ontario Canada
Source: PubMed Central journal article supplement (PMC9012353; doi:10.1371/journal.pone.0267019), 2022-04-15
Supplement: pone.0267019.s002.pdf [file pone.0267019.s002.pdf]

**S2 Table.** Descriptive statistics and unconditional associations of variables for the occurrence of breast meat myopathies in Ontario, Canada (2019 – 2020) are listed for each predictor variable.

Associations of the flock and environmental variables, related to the occurrence of the breast myopathies, for each predictor assessed within univariable logistic regression model, as related to the occurrence of spaghetti meat (SM), and woody breast (WB) as the outcome of interest

| Variable                                     | Number | Type        | Value                  | Odds ratios for SM | P value for SM | Odds ratios for WB | P value for WB |
|----------------------------------------------|--------|-------------|------------------------|--------------------|----------------|--------------------|----------------|
| <b>Farm management and spatial variables</b> |        |             |                        |                    |                |                    |                |
| FSA of hatcheries                            | 5,250  | Categorical | North                  | 1.40               | <0.001         | 1.02               | 0.671          |
|                                              | 4,000  | Categorical | South                  | Reference          |                | Reference          |                |
| Number of floors in a barn                   | 6,250  | Categorical | >1 floor               | 0.68               | <0.001         | 1.18               | 0.004          |
|                                              | 3,000  | Categorical | 1 floor                | Reference          |                | Reference          |                |
| <b>Flock demographics variables</b>          |        |             |                        |                    |                |                    |                |
| Age (d)                                      | 9,250  | Continuous  | 36 - 43                | 1.17               | <0.001         | 0.95               | 0.001          |
| Average live weight at slaughter (g)         | 3,250  | Categorical | Low (1,940 – 2,290)    | Reference          |                | Reference          |                |
|                                              | 3,000  | Categorical | Medium (2,300 – 2,450) | 1.26               | <0.001         | 0.89               | 0.072          |
|                                              | 3,000  | Categorical | High (2,460 – 2,630)   | 1.16               | 0.005          | 1.34               | <0.001         |
| Sex                                          | 3,750  | Categorical | Female                 | 2.25               | <0.001         | Reference          |                |
|                                              | 2,750  | Categorical | Male                   | Reference          |                | 1.56               | <0.001         |
|                                              | 2,750  | Categorical | Mixed                  | 1.45               | <0.001         | 1.04               | 0.499          |
| Source of chicks                             | 7,250  | Categorical | Domestic               | Reference          |                | Reference          |                |
|                                              | 1,000  | Categorical | Mixed                  | 1.38               | <0.001         | 0.53               | <0.001         |
|                                              | 1,000  | Categorical | USA                    | 1.49               | <0.001         | 0.78               | 0.002          |

S2 Table continued

| Variable                           | Number | Type        | Value                | Odds ratios for SM | P value for SM | Odds ratios for WB | P value for WB |
|------------------------------------|--------|-------------|----------------------|--------------------|----------------|--------------------|----------------|
| <b>Flock health</b>                |        |             |                      |                    |                |                    |                |
| Disease observed                   | 8,000  | Categorical | Disease not observed | Reference          |                | Reference          |                |
|                                    | 1,250  | Categorical | Disease observed     | 2.30               | <0.001         | 0.90               | 0.186          |
| Mortality rate during grow-out (%) | 3,250  | Categorical | Low (1.25–2.0)       | Reference          |                | Reference          |                |
|                                    | 4,250  | Categorical | Medium (2.1–3.0)     | 1.09               | 0.082          | 0.75               | <0.001         |
|                                    | 1,750  | Categorical | High (3.1–5.8)       | 1.16               | 0.014          | 0.67               | <0.001         |
| Raised without antibiotics (RWA)   | 7,250  | Categorical | Non-RWA              | Reference          |                | Reference          |                |
|                                    | 2,000  | Categorical | RWA                  | 1.32               | <0.001         | 0.82               | 0.003          |
| Coccidiosis vaccine                | 1,500  | Categorical | Administered         | 1.33               | <0.001         | 0.75               | <0.001         |
|                                    | 7,750  | Categorical | Not administered     | Reference          |                | Reference          |                |
| Infectious bursal disease vaccine  | 8,000  | Categorical | Administered         | 1.75               | <0.001         | 1.04               | 0.599          |
|                                    | 1,250  | Categorical | Not administered     | Reference          |                | Reference          |                |
| Infectious tenosynovitis vaccine   | 1,750  | Categorical | Administered         | 1.13               | 0.021          | 1.00               | 0.986          |
|                                    | 7,500  | Categorical | Not administered     | Reference          |                | Reference          |                |
| Marek's disease vaccine            | 8,500  | Categorical | Administered         | 0.97               | 0.585          | 0.94               | 0.420          |
|                                    | 750    | Categorical | Not administered     | Reference          |                | Reference          |                |
| Category III antimicrobials        | 6,250  | Categorical | Administered         | 0.96               | 0.326          | 1.09               | 0.145          |
|                                    | 3,000  | Categorical | Not administered     | Reference          |                | Reference          |                |
| Coccidiostats and/or ionophores    | 6,750  | Categorical | Administered         | 0.71               | <0.001         | 1.19               | 0.002          |
|                                    | 2,500  | Categorical | Not administered     | Reference          |                | Reference          |                |

S2 Table continued

| Variable                            | Number | Type        | Value              | Odds ratios<br>for SM | P value<br>for SM | Odds ratios<br>for WB | P value<br>for WB |
|-------------------------------------|--------|-------------|--------------------|-----------------------|-------------------|-----------------------|-------------------|
| <b>Transportation variables</b>     |        |             |                    |                       |                   |                       |                   |
| Birds per crate                     | 5,750  | Categorical | Low (8–9)          | Reference             |                   | Reference             |                   |
|                                     | 500    | Categorical | Medium (9.5–10)    | 1.35                  | 0.001             | 1.02                  | 0.854             |
|                                     | 3,000  | Categorical | High (10.5–12)     | 0.63                  | <0.001            | 1.46                  | <0.001            |
| Dead on arrival (%)                 | 9,250  | Continuous  | 0–0.16             | 0.96                  | <0.001            | 1.03                  | <0.001            |
| Duration without feed (min)         | 3,250  | Categorical | Low (300–685)      | Reference             |                   | Reference             |                   |
|                                     | 3,000  | Categorical | Medium (686–762)   | 0.87                  | 0.008             | 1.03                  | 0.646             |
|                                     | 3,000  | Categorical | High (763–1005)    | 0.83                  | 0.001             | 0.88                  | 0.056             |
| Duration without water (min)        | 9,250  | Categorical | Low (113–271)      | Reference             |                   | Reference             |                   |
|                                     | 9,250  | Categorical | Medium (272–363)   | 0.97                  | 0.572             | 1.14                  | 0.053             |
|                                     | 9,250  | Categorical | High (364–470)     | 0.99                  | 0.921             | 0.98                  | 0.801             |
| Loading duration (min)              | 9,250  | Categorical | Low (40–75)        | Reference             |                   | Reference             |                   |
|                                     | 9,250  | Categorical | Medium (76–100)    | 0.99                  | 0.789             | 0.95                  | 0.385             |
|                                     | 9,250  | Categorical | High (101–150)     | 1.05                  | 0.317             | 1.29                  | <0.001            |
| Truck travel time (min)             | 3,250  | Categorical | Low (20–68)        | Reference             |                   | Reference             |                   |
|                                     | 3,000  | Categorical | Medium (69–163)    | 1.28                  | <0.001            | 0.83                  | 0.006             |
|                                     | 3,000  | Categorical | High (164–798)     | 0.79                  | <0.001            | 0.97                  | 0.683             |
| <b>Processing plant variables</b>   |        |             |                    |                       |                   |                       |                   |
| Chilling method                     | 4,750  | Categorical | Air-chill          | Reference             |                   | Reference             |                   |
|                                     | 4,500  | Categorical | Water-chill        | 1.45                  | <0.001            | 0.91                  | 0.096             |
| Condemnation (%)                    | 3,250  | Categorical | Low (0.01–0.45)    | Reference             |                   | Reference             |                   |
|                                     | 3,000  | Categorical | Medium (0.46–1.14) | 0.94                  | 0.211             | 1.04                  | 0.590             |
|                                     | 3,000  | Categorical | High (1.15–2.81)   | 0.81                  | <0.001            | 1.25                  | 0.001             |
| Hold time on lairage at plant (min) | 3,250  | Categorical | Low (10–110)       | Reference             |                   | Reference             |                   |
|                                     | 3,000  | Categorical | Medium (111–160)   | 1.17                  | 0.002             | 0.79                  | 0.001             |
|                                     | 3,000  | Categorical | High (161–269)     | 0.77                  | <0.001            | 0.78                  | <0.001            |

S2 Table continued

| Variable                                    | Number | Type        | Value             | Odds ratios for SM | P value for SM | Odds ratios for WB | P value for WB |
|---------------------------------------------|--------|-------------|-------------------|--------------------|----------------|--------------------|----------------|
| <b>Environmental and temporal variables</b> |        |             |                   |                    |                |                    |                |
| Temperature during grow-out (°C)            | 3,250  | Categorical | Low (-9.8–0)      | Reference          |                | Reference          |                |
|                                             | 3,250  | Categorical | Medium (0.1–15.7) | 2.00               | <0.001         | 0.61               | <0.001         |
|                                             | 2,750  | Categorical | High (15.8–22.7)  | 2.33               | <0.001         | 0.58               | <0.001         |
| Temperature during transport (°C)           | 3,250  | Categorical | Low (-9.8–2.9)    | Reference          |                | Reference          |                |
|                                             | 3,000  | Categorical | Medium (3.0–12.9) | 1.65               | <0.001         | 0.60               | <0.001         |
|                                             | 3,000  | Categorical | High (13.0–23.7)  | 2.09               | <0.001         | 0.70               | <0.001         |
| Season                                      | 1,250  | Categorical | Spring            | 1.56               | <0.001         | 3.85               | <0.001         |
|                                             | 2,500  | Categorical | Summer            | 2.44               | <0.001         | 1.52               | <0.001         |
|                                             | 2,750  | Categorical | Fall              | 1.99               | <0.001         | 0.89               | <0.001         |
|                                             | 2,750  | Categorical | Winter            | Reference          |                | Reference          |                |
| Precipitation during grow-out (mm)          | 3,250  | Categorical | Low (0–66)        | Reference          |                | Reference          |                |
|                                             | 3,000  | Categorical | Medium (67–100)   | 1.60               | <0.001         | 0.89               | 0.074          |
|                                             | 3,000  | Categorical | High (101–165)    | 1.35               | <0.001         | 1.05               | 0.466          |
| Precipitation during transport (mm)         | 3,250  | Categorical | Low (0–0.1)       | Reference          |                | Reference          |                |
|                                             | 3,000  | Categorical | Medium (0.2–1.7)  | 0.80               | <0.001         | 1.06               | 0.363          |
|                                             | 3,000  | Categorical | High (1.8–20.2)   | 0.67               | <0.001         | 0.99               | 0.979          |
