# Supplementary material for: Prevalence of breast muscle myopathies (spaghetti meat, woody breast, white striping) and associated risk factors in broiler chickens from Ontario Canada
Source: PubMed Central journal article supplement (PMC9012353; doi:10.1371/journal.pone.0267019), 2022-04-15
Supplement: pone.0267019.s003.pdf [file pone.0267019.s003.pdf]

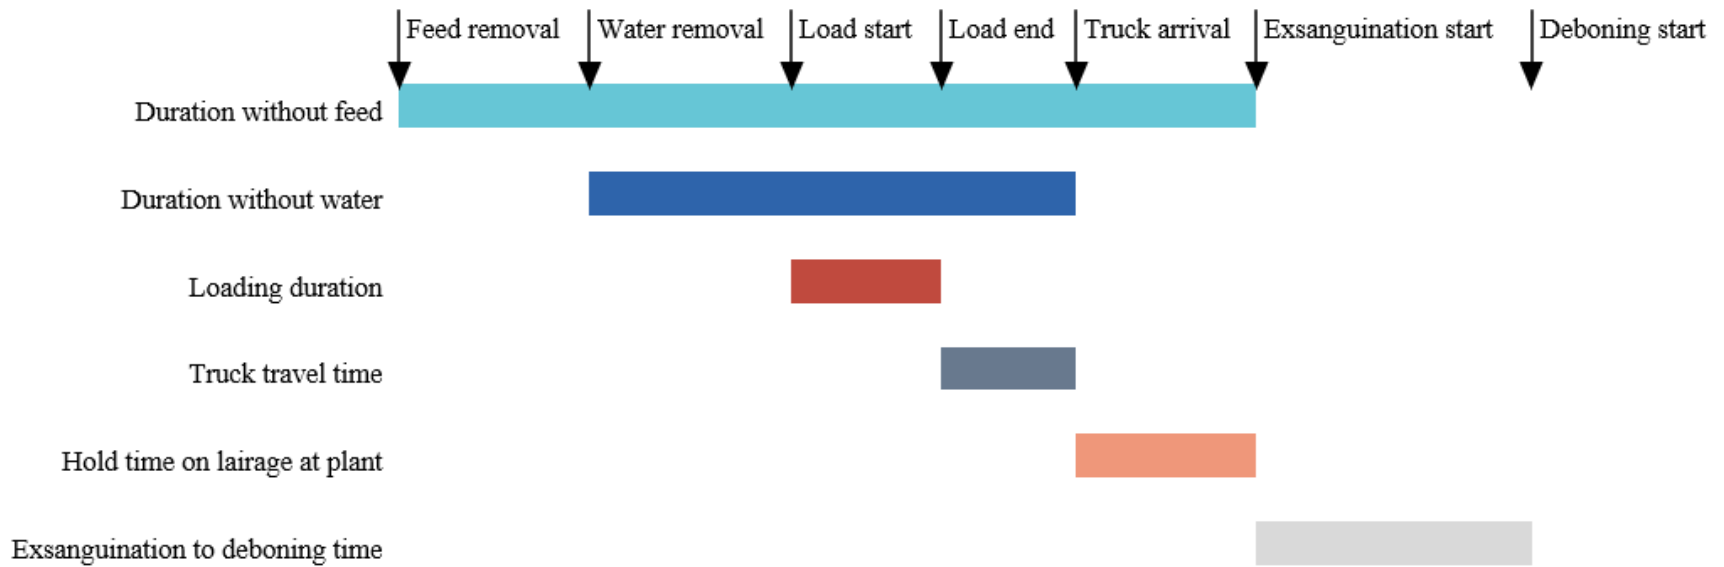

**S1 Figure** Categorization of multiple time segments (durations) associated with flock transportation from the farm and the beginning of the deboning process.
