# Supplementary material for: Prevalence of breast muscle myopathies (spaghetti meat, woody breast, white striping) and associated risk factors in broiler chickens from Ontario Canada
Source: PubMed Central journal article supplement (PMC9012353; doi:10.1371/journal.pone.0267019), 2022-04-15
Supplement: pone.0267019.s004.pdf [file pone.0267019.s004.pdf]

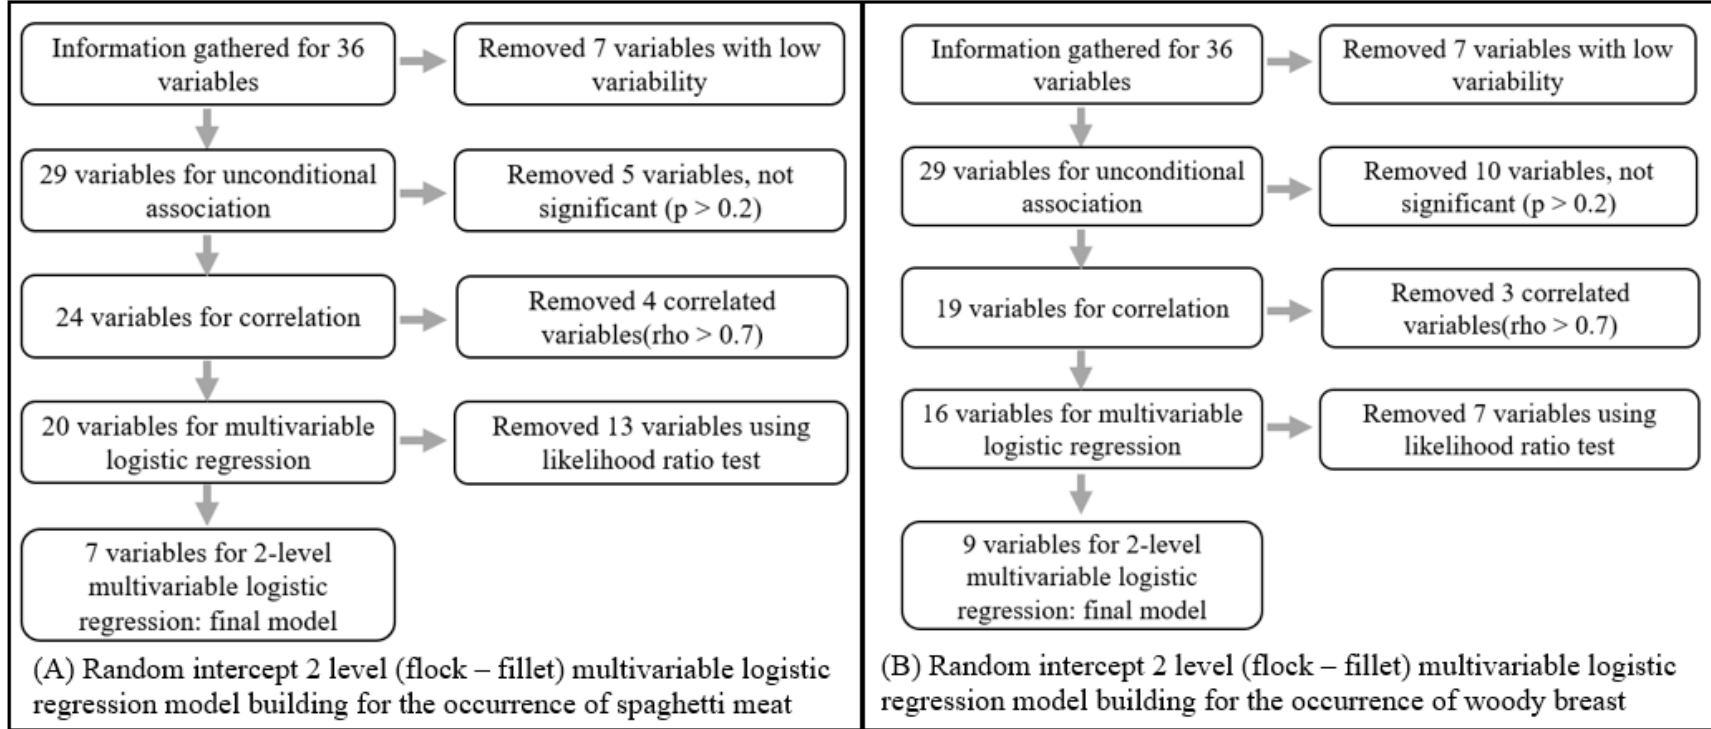

**S2 Figure.** Flow diagram demonstrating the statistical model building process of variable selection and stepwise logistic regression analysis for spaghetti meat and woody breast.

**(A)** Random intercept 2-level (flock-fillet) multivariable logistic regression model building for the occurrence of spaghetti meat: information on 36 variables was collected from processing plants and Environment Canada weather stations. Seven variables with low variability ( $< 5.5\%$ ) were removed, 29 variables were used for unconditional associations, and 5 variables were removed using a relaxed  $p$ -value ( $p < 0.2$ ). Twenty-four variables were used for the correlation analysis, and 4 variables were removed because of strong collinearity ( $\rho > 0.7$ ). Multivariable logistic regression models were built for 20 variables. Thirteen variables were removed using the likelihood ratio (LR) test during a manual backward elimination process. Random intercept 2-level (flock-fillet) model was built, an intra-class correlation coefficient (ICC) was calculated, and the final model included 7 variables.

**(B)** Multivariable logistic regression model building for the occurrence of the woody breast: information on 36 variables was collected from processing plants and Environment Canada weather stations. Seven variables with low variability ( $< 5.5\%$ ) were removed, 29

variables were used for unconditional associations, and 10 variables were removed using a relaxed p-value ( $p < 0.2$ ). Nineteen variables were used for the correlation analysis, and 3 variables were removed because of strong collinearity ( $\rho > 0.7$ ). Multivariable logistic regression models were built for 16 variables. Seven variables were removed using the LR test during a manual backward elimination process. Random intercept 2-level model was built, an ICC was calculated, and the final model included 9 variables.
